# Supplementary material for: Is Transcatheter Aortic Valve Replacement Better Than Surgical Aortic Valve Replacement in Patients With Chronic Obstructive Pulmonary Disease? A Nationwide Inpatient Sample Analysis
Source: PubMed Central journal article supplement — J Am Heart Assoc. 2018 Apr 1;7(7):e008408. doi: 10.1161/JAHA.117.008408 (PMC5907603; doi:10.1161/jaha.117.008408), 2018-04-01
Supplement: JAH3-7-e008408-s001.pdf [file JAH3-7-e008408-s001.pdf]

# **SUPPLEMENTAL MATERIAL**

**Data S1.**

Patient safety indicators (PSI), based on ICD-9-CM codes and Medicare severity Diagnosis-Related Groups, were established by the Agency for Healthcare Research and Quality to monitor preventable adverse events during hospitalization and each PSI has specific inclusion and exclusion criteria. PSI individual measure technical specifications, Version 5.0, March 2015 was used to identify & define preventable complications.

**Table S1. International Classification of Diseases, Clinical Modification (ICD-9-CM) codes used in the study.**

| <b>Procedures</b>                           |                                                                                    |
|---------------------------------------------|------------------------------------------------------------------------------------|
| Endovascular TAVR                           | 35.05                                                                              |
| SAVR                                        | 35.21, 35.22                                                                       |
| Others                                      |                                                                                    |
| Aortic insufficiency                        | 395.1, 746.4, and 396.3                                                            |
| Aortic stenosis                             | 395.0, 395.2, 396.0, 396.2, 424.1 and 746.3                                        |
| Mitral value surgery                        | 35.23, 35.24                                                                       |
| Pulmonary value surgery                     | 35.25, 35.26                                                                       |
| Tricuspid value surgery                     | 35.27,35.28                                                                        |
| Atrium or ventricular septum defect closure | 35.5,35.6, and 35.7                                                                |
| CAGB                                        | 36.10                                                                              |
| <b>Comorbidities</b>                        |                                                                                    |
| Stroke/TIA                                  | V12.54, 430, 431, 432.0-432.9, 434.01, 434.11, 434.91, 435.0-435.9                 |
| Smoking                                     | V15.82, 305.1                                                                      |
| Chronic Obstructive Pulmonary Disease       | 491, 492, 494, 496                                                                 |
| Oxygen dependent                            | V462                                                                               |
| <b>In-Hospital Morbidity</b>                |                                                                                    |
| Procedural                                  |                                                                                    |
| Post-op hemorrhage                          | 998.11, 998.12, 285.1                                                              |
| Bleeding requiring transfusion              | 99.0x                                                                              |
| Stroke                                      | 997.01, 997.02                                                                     |
| Cardiovascular                              |                                                                                    |
| Acute Myocardial Infarction                 | 410.01, 410.11, 410.21, 410.31, 410.41, 410.51, 410.61,410.71,410.81,410.91, 411.1 |
| Pulmonary Embolism                          | PSI                                                                                |
| Deep Vein Thrombosis                        | PSI                                                                                |
| Pulmonary                                   |                                                                                    |
| Pneumonia                                   | 480, 481, 482, 483, 484, 485, 486, 997.31, 997.32                                  |
| Noninvasive Ventilation                     | 93.90                                                                              |
| Acute respiratory failure                   | 518.81, 518.82, 518.84, 799.1, 786.09, 518.4, 518.51                               |
| Re-intubation                               | 96.03, 96.04, 96.05                                                                |
| Tracheostomy                                | 31.1, 31.21, 31.29                                                                 |
| Infectious                                  |                                                                                    |
| Sepsis                                      | PSI                                                                                |
| Renal complication                          |                                                                                    |
| Acute kidney injury                         | 584.5, 584.6, 584.7,584.8 584.9                                                    |

**Table S2. Variables Used for Propensity Score Matching.**

Age  
Race  
Sex  
Hypertension  
Diabetes mellitus  
Congestive heart failure  
Peripheral vascular disease  
Pulmonary hypertension  
Hypercoagulable state  
Obesity  
Coronary artery disease  
Valvulopathy  
Chronic liver disease  
Electrolyte abnormalities  
Blood loss anemia  
Iron deficiency anemia  
Paralysis  
Neurologic disorders  
Chronic lung disease  
Depression  
Hypothyroidism  
Lymphoma  
Metastatic disease  
Solid tumors without metastasis  
Collagen vascular disease  
Weight loss  
Alcoholism  
Depression  
Drug abuse  
Smoking  
Psychosis  
Hospital teaching status  
Acquired immunodeficiency syndrome.  
Hospital region  
Expected Primary payer  
Hospital bed size  
Median Household income  
Oxygen dependent
